# Supplementary material
Source: ML conference proceedings conference paper supplement (https://openreview.net/forum?id=O5Wr-xX0U2y)
Supplement: supplementary_material [file attachment]

## A ADDITIONAL MATERIAL FOR SECTION 3

### A.1 PROOF OF PROPOSITION 3.1

We start by proving first that given any  $\pi^*$  that satisfies (3), it must also satisfy

$$\pi^* \in \arg \min_{\pi} \mathbb{E}_{(t,s) \sim \beta} [Q_t^{\pi^*}(s, \pi_t(s))], \quad (5)$$

where  $\beta$  captures the distribution of  $(\tilde{t}, s_{\tilde{t}})$  used in (3). We do so by contradiction. Let's assume that there exists a  $\bar{\pi}$  such that

$$\mathbb{E}_{(t,s) \sim \beta} [Q_t^{\bar{\pi}}(s, \bar{\pi}_t(s))] < \mathbb{E}_{(t,s) \sim \beta} [Q_t^{\pi^*}(s, \pi_t^*(s))].$$

Then, one can design the following policy:

$$\bar{\pi}_t(s) := \begin{cases} \bar{\pi}_t(s) & \text{if } Q_t^{\pi^*}(s, \bar{\pi}_t(s)) < Q_t^{\pi^*}(s, \pi_t^*(s)) \\ \pi_t^*(s) & \text{otherwise.} \end{cases}$$

Using a recursive argument, one can show that  $Q_t^{\bar{\pi}}(s_t, a_t) \leq Q_t^{\pi^*}(s_t, a_t)$  for all  $t$  and  $(s_t, a_t)$  pair. In this recursion, we start with:

$$Q_T^{\bar{\pi}}(s_T, a_T) = -r_T(s_T, a_T, s_T) = Q_T^{\pi^*}(s_T, a_T).$$

Moreover, for all  $t < T$ , and  $(s_t, a_t)$  pairs, we have that:

$$\begin{aligned} Q_t^{\bar{\pi}}(s_t, a_t) &= \bar{\rho}(-r_t(s_t, a_t, s_{t+1}) + Q_{t+1}^{\bar{\pi}}(s_{t+1}, \bar{\pi}^*(s_{t+1})) | s_t) \\ &\leq \bar{\rho}(-r_t(s_t, a_t, s_{t+1}) + Q_{t+1}^{\pi^*}(s_{t+1}, \bar{\pi}^*(s_{t+1})) | s_t) \\ &\leq \bar{\rho}(-r_t(s_t, a_t, s_{t+1}) + Q_{t+1}^{\pi^*}(s_{t+1}, \pi^*(s_{t+1})) | s_t) = Q_t^{\pi^*}(s_t, a_t), \end{aligned}$$

where we first used  $Q_{t+1}^{\bar{\pi}}(s_t, a_t) \leq Q_{t+1}^{\pi^*}(s_t, a_t)$ , then exploited the definition of  $\bar{\pi}_t^*$ . With this result in hand we can obtain that for all  $t$  and  $s_t$

$$Q_t^{\bar{\pi}}(s_t, \bar{\pi}_t^*(s_t)) \leq Q_t^{\pi^*}(s_t, \bar{\pi}_t^*(s_t)) \leq Q_t^{\pi^*}(s_t, \pi_t^*(s_t)),$$

where we again used the definition of  $\bar{\pi}^*$ . Finally, we must therefore have that:

$$\mathbb{E}_{(t,s) \sim \beta} [Q_t^{\bar{\pi}}(s, \bar{\pi}_t^*(s))] \leq \mathbb{E}_{(t,s) \sim \beta} [Q_t^{\pi^*}(s, \bar{\pi}_t^*(s))] < \mathbb{E}_{(t,s) \sim \beta} [Q_t^{\pi^*}(s, \pi_t^*(s))]$$

which leads to a contradiction, hence (5) must hold.

Next, applying the interchangeability property (see Shapiro (2017)) to equation (5) and using the fact that the  $\beta$  distribution puts positive probability on all time periods and all sub-regions of  $\mathcal{S} \times \mathcal{A}$ , we know that the following necessarily hold:

$$\pi_t^*(s) \in \arg \min_a Q_t^{\pi^*}(s, a), \quad \forall s \in \mathcal{S}, \forall t \in \{0, \dots, T\}.$$

Our last step involves using recursion to show that  $\pi^* \in \arg \min_{\pi} Q_t^{\pi}(s_t, \pi_t(s_t))$  for all  $t$  and all  $s_t$ . We start once more at  $t = T$  where for all  $s_T$ :

$$Q_T^{\pi^*}(s_T, \pi_T^*(s_T)) = \min_{a_T} Q_T^{\pi^*}(s_T, a_T) = \min_{a_T} -r_T(s_T, a_T, s_T) \leq Q_T^{\pi}(s_T, \pi_T(s_T)), \quad \forall \pi.$$

And then recursively for all  $t < T$  and all  $s_t$ ,

$$\begin{aligned} Q_t^{\pi^*}(s_t, \pi_t^*(s_t)) &= \min_{a_t} Q_t^{\pi^*}(s_t, a_t) \\ &= \min_{a_t} \bar{\rho}(-r_t(s_t, a_t, s_{t+1}) + Q_{t+1}^{\pi^*}(s_{t+1}, \pi_{t+1}^*(s_{t+1})) | s_t) \\ &\leq \min_{a_t} \bar{\rho}(-r_t(s_t, a_t, s_{t+1}) + Q_{t+1}^{\pi}(s_{t+1}, \pi_{t+1}(s_{t+1})) | s_t) \quad \forall \pi \\ &\leq \bar{\rho}(-r_t(s_t, \pi_t(s_t), s_{t+1}) + Q_{t+1}^{\pi}(s_{t+1}, \pi_{t+1}(s_{t+1})) | s_t) \quad \forall \pi \\ &\leq \min_{\pi} Q_t^{\pi}(s_t, \pi_t(s_t)). \quad \square \end{aligned}$$

## A.2 ADAPTING DDPG TO HANDLE DYNAMIC EXPECTILE RISK MEASURES

We include below the extension of deep deterministic policy gradient (DDPG) algorithm to a risk averse MDP that employs a dynamic expectile risk measure. In **bold** we highlight the modification to DDPG that is due to the use of a dynamic expectile risk measure. Note that after assuming that the information about  $t$  is included in the state, we drop the subscript  $t$  notation to increase similarity with [Lillicrap et al. \(2015\)](#). For completeness, we make precise that the original DDPG uses  $\partial\ell(y) := 2y$  while this risk averse DDPG, with risk level  $\tau$ , uses  $\partial\ell(y) := 2(\tau \max(0, y) - (1 - \tau) \max(0, -y))$ .

---

**Algorithm 2:** Risk averse deep deterministic policy gradient

---

Randomly initialize the main actor and critic networks' parameters  $\theta^\pi$  and  $\theta^Q$ ;

Initialize the target actor,  $\theta^{\pi'} \leftarrow \theta^\pi$ , and critic,  $\theta^{Q'} \leftarrow \theta^Q$ , networks;

Initialize replay buffers  $R$ ;

**for**  $j = 1 : \#Episodes$  **do**

    Initialize a random process  $\mathcal{N}$  for action exploration;

    Receive initial observation state  $s_0$ ;

**for**  $t = 0 : T - 1$  **do**

        Select action  $a_t = \pi_t(s_t | \theta^\pi) + \mathcal{N}_t$ ;

        Execute  $a_t$  and observe reward  $r_t$  and new state  $s_{t+1}$ ;

        Store transition  $(s_t, a_t, r_t, s_{t+1})$  in  $R$ ;

        Sample a minibatch of  $N$  transitions  $\{(s_j, a_j, r_j, s_{j+1})\}_{j=1}^N$  in  $R$ ;

        Set the realized losses  $y_j^i := -r_j^i + Q(s_{j+1}^i, \pi(s_{j+1}^i | \theta^{\pi'}) | \theta^{Q'})$ ;

        Update the main critic network:

$$\theta^Q \leftarrow \theta^Q - \alpha \frac{1}{N} \sum_{i=1}^N \partial\ell(Q(s_j^i, a_j^i | \theta^Q) - y_j^i) \nabla_{\theta^Q} Q(s_j^i, a_j^i | \theta^Q)$$

        where  $\partial\ell(y) := \tau \max(0, y) - (1 - \tau) \max(0, -y)$ ;

        Update the main actor network:

$$\theta^\pi \leftarrow \theta^\pi - \alpha \frac{1}{N} \sum_{i=1}^N \nabla_a Q(s_j^i, a | \theta^Q) |_{a=\pi(s_j^i | \theta^\pi)} \nabla_{\theta^\pi} \pi(s_j^i | \theta^\pi);$$

        Update the target networks:

$$\theta^{Q'} \leftarrow \alpha \theta^Q + (1 - \alpha) \theta^{Q'}, \quad \theta^{\pi'} \leftarrow \alpha \theta^\pi + (1 - \alpha) \theta^{\pi'};$$

**end**

**end**

---

## B ADDITIONAL MATERIAL FOR SECTION 4

Table 3: Stock data including the mean, standard deviation, and the correlation matrix

|          | AAPL    | AMZN    | FB      | JPM    | GOOGL   |
|----------|---------|---------|---------|--------|---------|
| $S_0$    | 78.81   | 1877.94 | 221.77  | 137.25 | 1450.16 |
| $\mu$    | -0.0015 | -0.0017 | -0.0001 | 0.0006 | -0.0004 |
| $\sigma$ | 0.0298  | 0.0243  | 0.0295  | 0.0345 | 0.0246  |
| AAPL     | 1.0000  | 0.7133  | 0.7744  | 0.5383 | 0.7680  |
| AMZN     | 0.7133  | 1.0000  | 0.6903  | 0.2685 | 0.6837  |
| FB       | 0.7744  | 0.6903  | 1.0000  | 0.4807 | 0.8054  |
| JPM      | 0.5383  | 0.2685  | 0.4807  | 1.0000 | 0.6060  |
| GOOGL    | 0.7680  | 0.6837  | 0.8054  | 0.6060 | 1.0000  |

## B.1 ADDITIONAL MATERIAL FOR SECTION 4.2

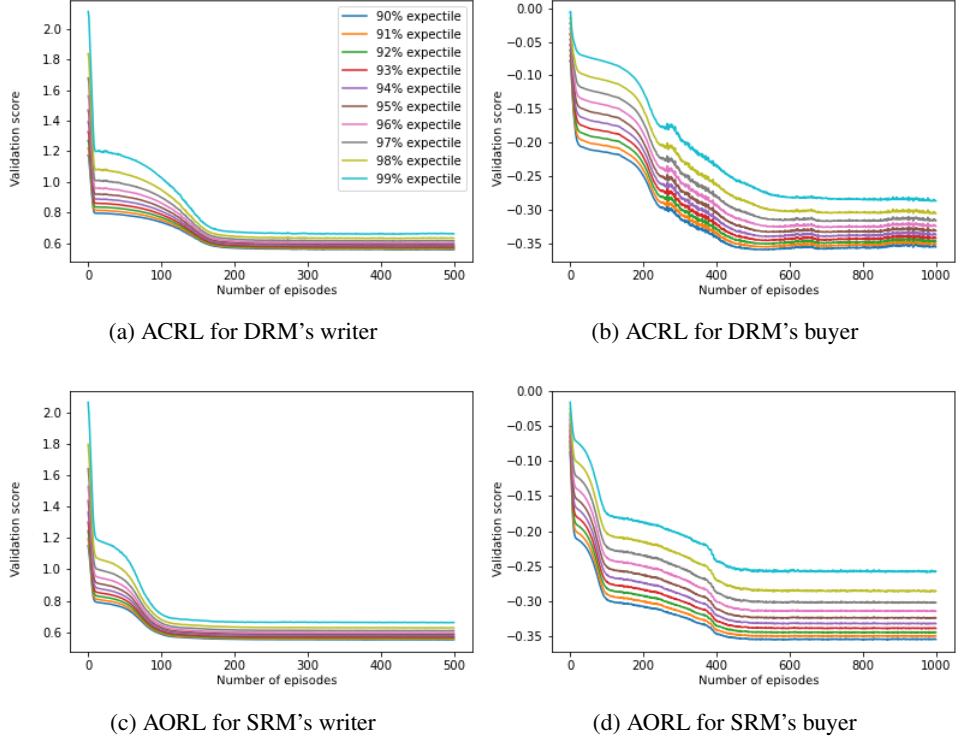

Figure 2: Learning curves of the DRM and SRM for an at-the-money vanilla call option on AAPL when a 90% expectile measure is used. The graphs show the validation scores for a range of static expectile measures with risk level ranging from 90% to 99%.

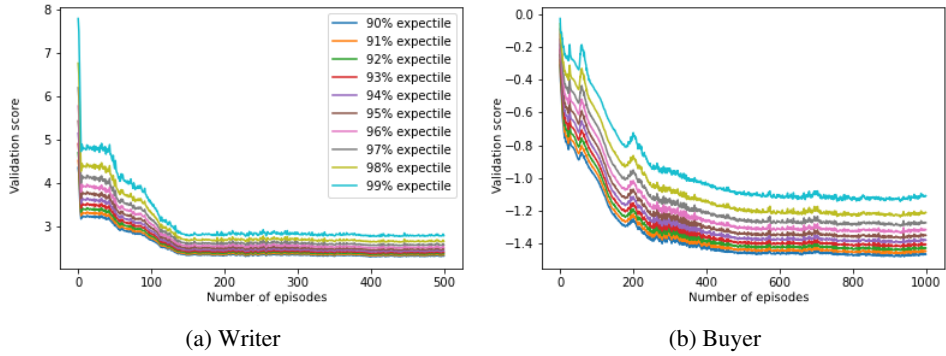

Figure 3: Learning curves of the ACRL algorithm for the writer and buyer's DRM for a basket at-the-money call option over AAPL, AMZN, FB, JPM, and GOOGL at the risk level  $\tau = 90\%$ . The graphs show the validation scores for a range of static expectile measures with risk level ranging from 90% to 99%.

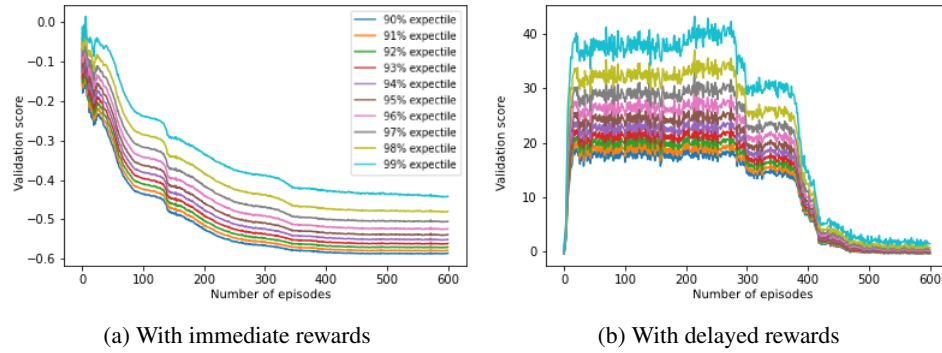

Figure 4: Learning curves of the ACRL algorithm for the buyer’s DRM when using (a) the immediate rewards versus (b) delayed rewards in the hedging of a vanilla call at-the-money option.

## B.2 ADDITIONAL MATERIAL FOR SECTION 4.3

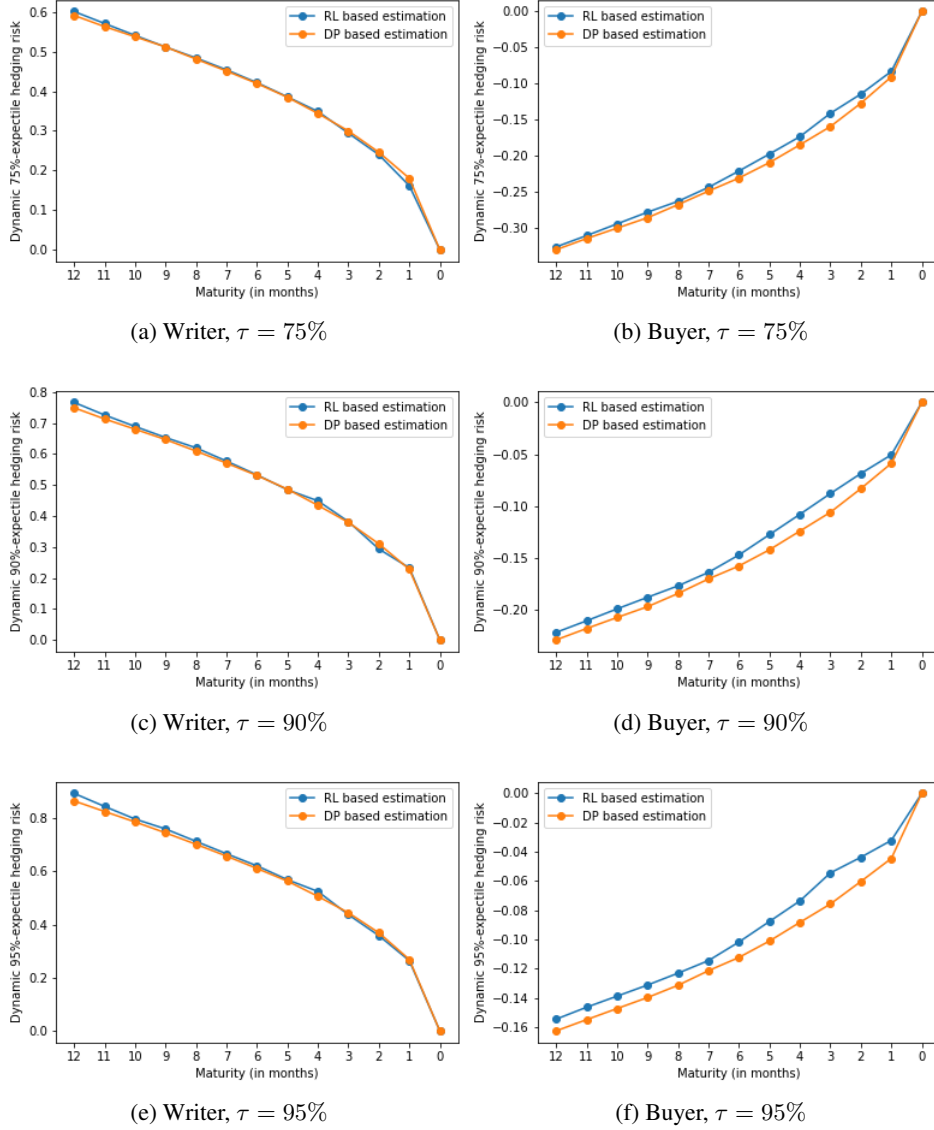

Figure 5: The out-of-sample dynamic risk imposed to the two sides of a vanilla at-the-money call option over AAPL (with maturity ranging from 12 months to 0 months) under the DRM policy trained for a 12 months maturity and at different risk levels  $\tau \in \{75\%, 90\%, 95\%\}$ .

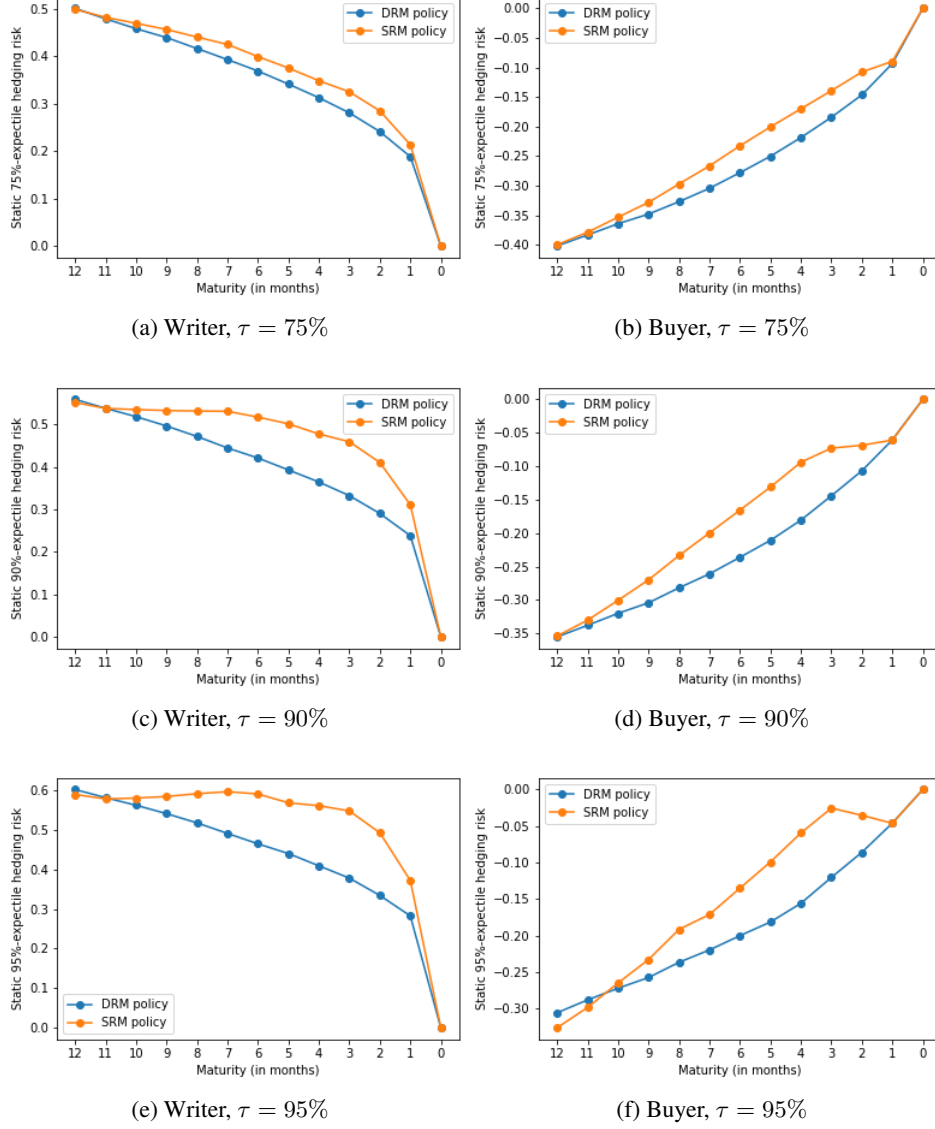

Figure 6: The out-of-sample static risk imposed to the two sides of a vanilla at-the-money call option over AAPL (with maturity ranging from 12 months to 2 months) under the DRM and SRM policies trained for a 12 months maturity and at different risk levels  $\tau \in \{75\%, 90\%, 95\%\}$ .

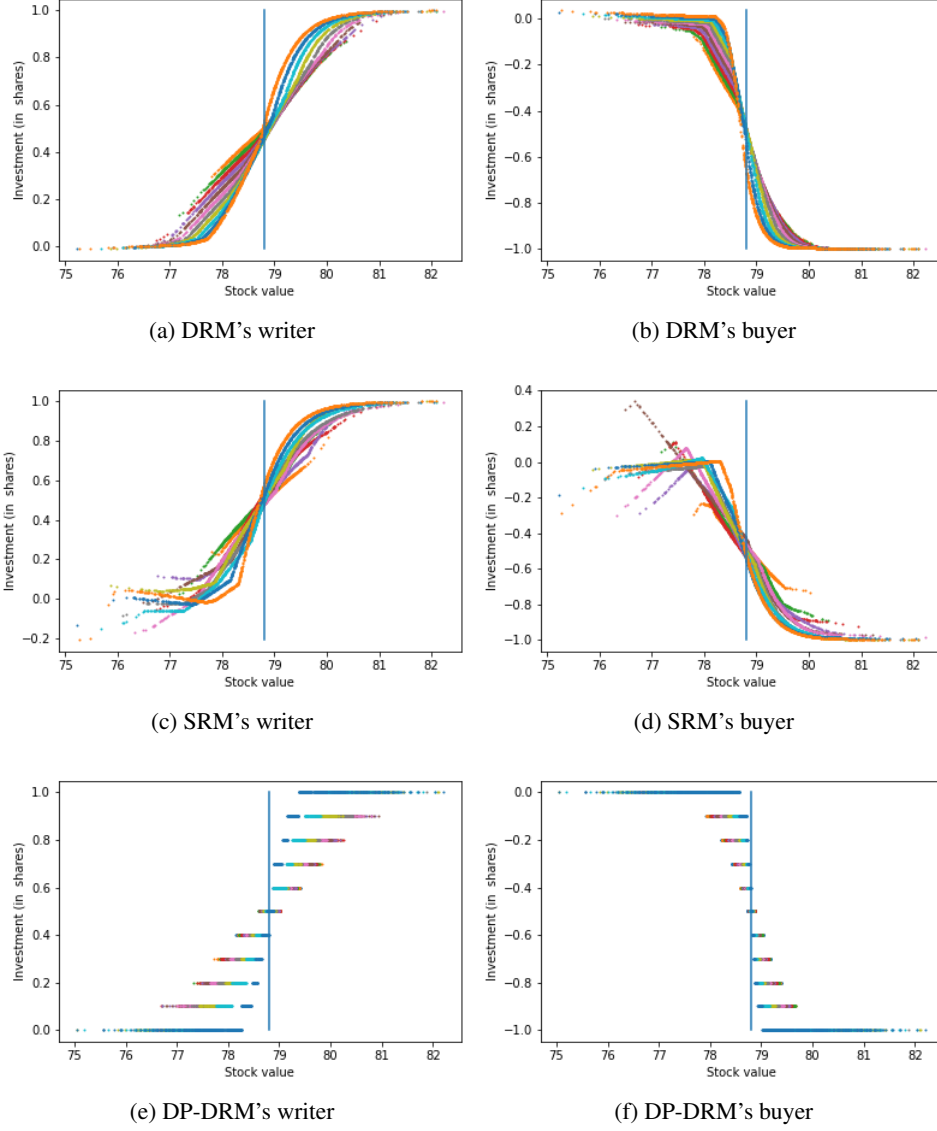

Figure 7: Comparison of the optimal DRL policies obtained for DRM and SRM (with 90% expected measures) to the discretized DP solution (DP-DRM) for an at-the-money vanilla call option on AAPL with a one year maturity. Each figure presents the sampled actions in our simulated trajectories as a function of the AAPL stock value. The strike price is marked at 78.81.

## B.3 ADDITIONAL MATERIAL FOR SECTION 4.4

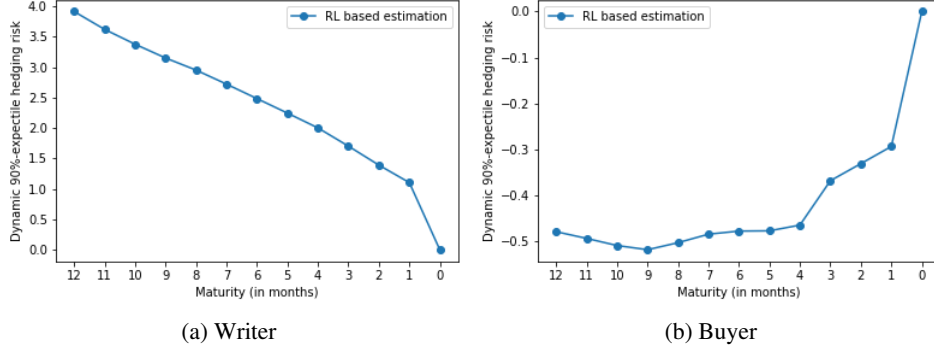

Figure 8: The out-of-sample dynamic risk imposed to the two sides of a basket at-the-money call option over AAPL, AMZN, FB, JPM, and GOOGL at the risk level  $\tau = 90\%$  (as maturity ranges from 12 to 0 months) under a DRM policy trained for a 12 months maturity.

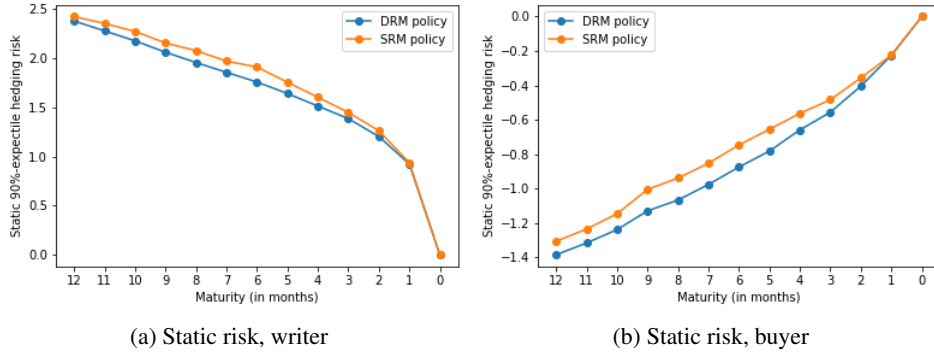

Figure 9: The out-of-sample static risk imposed to the two sides of a basket at-the-money call option over AAPL, AMZN, FB, JPM, and GOOGL at the risk level  $\tau = 90\%$  (as maturity ranges from 12 to 0 months) under the DRM and SRM policies trained for a 12 months maturity.
